# Supplementary material for: Tara (Caesalpinia spinosa) in Natural and Agroforestry Systems under an Altitudinal Gradient in the Peruvian Andes: Responses to Soil and Climate Variation
Source: MDPI journal article supplement (doi:10.3390/agronomy13020282), 2023-01-17
Supplement: s1 [file s1]

Archive with 1 entries (1 files):
- agronomy-2122463-supplementary.pdf
